# Supplementary material for: Pheochromocytomas and paragangliomas in von Hippel–Lindau disease: not a needle in a haystack
Source: PubMed Central journal article supplement — Endocr Connect. 2021 Sep 30;10(11):R293–304. doi: 10.1530/EC-21-0294 (PMC8630766; doi:10.1530/ec-21-0294), 2021-09-30
Supplement: supplementary_table_1.pdf [file supplementary_table_1.pdf]

## Supplementary Materials

**Table S1.** Search terms and queries used in this systematic review.

|                       |                                                                                                                                                                                                                                                                                                                                                                                                                                                                                                                                                                                                                                                                                                                                                                                                                                                                                                                                                                                                                                                                                                                                                                                                        |
|-----------------------|--------------------------------------------------------------------------------------------------------------------------------------------------------------------------------------------------------------------------------------------------------------------------------------------------------------------------------------------------------------------------------------------------------------------------------------------------------------------------------------------------------------------------------------------------------------------------------------------------------------------------------------------------------------------------------------------------------------------------------------------------------------------------------------------------------------------------------------------------------------------------------------------------------------------------------------------------------------------------------------------------------------------------------------------------------------------------------------------------------------------------------------------------------------------------------------------------------|
| <b>MEDLINE/PubMed</b> | <p>((von hippel-lindau[Text Word]) OR (VHL[Text Word]) OR (von hippel lindau syndrome[MeSH Terms]) OR (syndrome, von hippel lindau[MeSH Terms]) OR (von hippel lindau disease[MeSH Terms])) AND ((pheochromocytoma*[Text Word]) OR ("medullary chromaffinoma*" [Text Word]) OR ("medullary paraganglioma*" [Text Word]) OR (phaeochromocytoma*[Text Word]) OR (phaeochromoblastoma*[Text Word]) OR (pheochromocytosis[Text Word]) OR (paraganglioma*[Text Word]) OR ("paraganglion tumor*" [Text Word]) OR ("paraganglion neoplasm*" [Text Word]) OR (paraganglioneuroma*[Text Word]) OR (hemangioblastoma*[Text Word]) OR (haemangioblastoma*[Text Word]) OR (pheochromocytoma[MeSH Terms]) OR (paraganglioma[MeSH Terms]) OR (hemangioblastoma[MeSH Terms])) AND ((cohort studies[MeSH Terms]) OR (cohort*[Text Word]) OR (controlled clinical trial[Publication Type]) OR (case control studies[MeSH Terms]) OR (case*[Text Word] AND control*[Text Word]) OR (case*[Text Word] AND series[Text Word]) OR (prevalen*[Text Word]) OR (epidemiolog*[Text Word]) OR (frequen*[Text Word]) OR (incidence[Text Word]) OR (screening[Text Word]) OR (surveillance[Text Word]) OR detect*[Text Word]))</p> |
| <b>Web of Science</b> | <p>TS=(von hippel-lindau OR VHL) AND TS=(pheochromocytoma* OR "medullary chromaffinoma*" OR "medullary paraganglioma*" OR phaeochromocytoma* OR phaeochromoblastoma* OR pheochromocytosis OR paraganglioma OR "paraganglion tumor*" OR "paraganglion neoplasm*" OR paraganglioneuroma* OR hemangioblastoma* OR haemangioblastoma*) AND TS=(cohort* OR (case* AND control*) OR (case* AND series) OR prevalen* OR epidemiolog* OR frequen* OR incidence OR screening OR surveillance OR detect*)</p>                                                                                                                                                                                                                                                                                                                                                                                                                                                                                                                                                                                                                                                                                                    |
| <b>Scopus</b>         | <p>TITLE-ABS-KEY ( von AND hippel-lindau OR vhl) AND TITLE-ABS-KEY ( pheochromocytoma* OR "medullary chromaffinoma*" OR "medullary paraganglioma*" OR phaeochromocytoma* OR phaeochromoblastoma* OR pheochromocytosis OR paraganglioma OR "paraganglion tumor*" OR "paraganglion neoplasm*" OR paraganglioneuroma* OR hemangioblastoma* OR haemangioblastoma* ) AND TITLE-ABS-KEY ( cohort* OR ( case* AND control* ) OR ( case* AND series ) OR prevalen* OR epidemiolog* OR frequen* OR incidence OR screening OR surveillance OR detect* )</p>                                                                                                                                                                                                                                                                                                                                                                                                                                                                                                                                                                                                                                                      |
