# Supplementary material for: Pheochromocytomas and paragangliomas in von Hippel–Lindau disease: not a needle in a haystack
Source: PubMed Central journal article supplement — Endocr Connect. 2021 Sep 30;10(11):R293–304. doi: 10.1530/EC-21-0294 (PMC8630766; doi:10.1530/ec-21-0294), 2021-09-30
Supplement: supplementary_table_2.pdf [file supplementary_table_2.pdf]

## Supplementary Materials

**Table S2.** References of the 13 publications with full-text not obtainable despite contacting corresponding authors.

---

### References

---

Wiklund L, Nordling M, Engwall Y, Martinsson T, Szentgyorgyi E, Wahlstrom J. [von Hippel-Lindau hereditary tumor syndrome. Mutational analysis may improve prognosis]. *Lakartidningen*. 1995;92(11):1093-6

Wysocka B, Welnicka-Jaskiewicz M, Matuszewska K, Sloniewski P, Jassem J, Izycka-Swieszewska E, Borowska-Lehman J, Limon J. The occurrence of cerebellar hemangioblastoma in numerous first degree relatives with von Hippel-Lindau disease. *Folia Neuropathologica*. 1999;37(3):175-8.

Aubert-Petit G, Baudin E, Cailleux AF, Pellegriti G, Elias D, Travagli JP, Giraud S, Richard S, Schlumberger M. Neuroendocrine tumors and Von Hippel-Lindau disease: Three cases. *Presse Medicale*. 1999;28(23):1231-4.

Filling-Katz MR, Choyke PL, Oldfield E, Charnas L, Patronas NJ, Glenn GM, Gorin MB, Morgan JK, Linehan WM, Seizinger BR, et al. Central nervous system involvement in von hippel-lindau disease. *Neurology*. 1991;41(1):41-6.

Jinxu L, Yifan W, Sheng W, Hongwei S, Wenyan D. Mutation analysis for a family affected with von Hippel-Lindau syndrome. *Chinese Journal of Medical Genetics*. 2018;35(6):860-3.

Medlej-Hashim M, Leclercq A, Salem N, Moukarzel M, Merhej S, Pigny P, Megarbane A. Von Hippel-Lindau syndrome: Molecular diagnosis of two Lebanese families and analysis of the genotype-phenotype correlation. *Journal Medical Libanais*. 2004;52(1):51-4.

Su SB, Yang XJ, Zhang JN, Zhang DJ, Liu CX, Yu K, Zeng Z. Von Hippel-Lindau disease: A report of 3 Chinese families and literature review. *Chinese Journal of Contemporary Neurology and Neurosurgery*. 2007;7(4):374-8.

Golas L, Skondra D, Ittiara S, Bajic N, Jeng-Miller KW, Mukai S, Yonekawa Y, Blair MP. Efficacy of retinal lesion screening in von Hippel-Lindau patients with widefield color fundus imaging versus widefield FA. *Ophthalmic Surgery Lasers and Imaging Retina*. 2019;50(11):E260-E5

Lang SJ, Cakir B, Evers C, Ludwig F, Lange CAK, Agostini HT. Value of optical coherence tomography angiography imaging in diagnosis and treatment of hemangioblastomas in von hippel-lindau disease. *Ophthalmic Surgery Lasers and Imaging Retina*. 2016;47(10):935-46.

Zhou DH, Wang YM, Lan T, Dong YC, Zhang B, Li WP, Ma WQ, Chang DH. Mutation screening of VHL gene in a Chinese family with nonsyndromic pheochromocytoma. *Chinese Journal of Medical Genetics*. 2007;24(4):365-8.

Becker R, Bauer BL, Mennel HD, Plate KH. Cerebellar primitive neuroectodermal tumor with multipotent differentiation in a family with von Hippel-Lindau disease. Case report. *Clinical Neuropathology*. 1993;12(2):107-11.

Bilge T, Bilge S, Barut S, Cokneşeli B. Familial hemangioblastoma and von Hippel-Lindau's disease: case report. *Acta neurologica Belgica*. 1991;91(4):223-9

Chen JM, Liu FB, Geng XP, Zhao YJ, Zhao HC, Wang GB, Huang F. [Family survey and clinical analysis of von Hippel-Lindau syndrome]. *Zhonghua wai ke za zhi [Chinese journal of surgery]*. 2012;50(5):413-7

---
