# Supplementary material for: Pheochromocytomas and paragangliomas in von Hippel–Lindau disease: not a needle in a haystack
Source: PubMed Central journal article supplement — Endocr Connect. 2021 Sep 30;10(11):R293–304. doi: 10.1530/EC-21-0294 (PMC8630766; doi:10.1530/ec-21-0294), 2021-09-30
Supplement: supplementary_table_3.pdf [file supplementary_table_3.pdf]

## Supplementary Materials

**Table S3.** Description of studies included in the systematic review by region, sampling method, method of diagnosis, mean onset age of von Hippel-Lindau disease (vHL), number of participants with vHL, mean cohort age and number of participants with pheochromocytoma and/or paraganglioma (PPGL).

| Study                      | Region | Sampling      | Diagnosis, (mean onset age, years) | No. vHL participants, (% males), [mean cohort age, years] | No. of participants with PPGL |
|----------------------------|--------|---------------|------------------------------------|-----------------------------------------------------------|-------------------------------|
| Feletti et al, 2016(6)     | Europe | Consecutive   | Included genetic testing, (-)      | 128, (-), [-]                                             | 39                            |
| Ciotti et al, 2009(12)     | Europe | Not specified | Included genetic testing, (-)      | 27, (-), [-]                                              | 4                             |
| Cybulski et al, 2002(13)   | Europe | Consecutive   | Included genetic testing, (-)      | 82, (-), [-]                                              | 3                             |
| Dollfus et al, 2002(14)    | Europe | Consecutive   | Included genetic testing, (28.0)   | 211, (-), [-]                                             | 44                            |
| Erlic et al, 2010(15)      | Europe | Consecutive   | Included genetic testing, (-)      | 469, (-), [-]                                             | 177                           |
| FJ OB et al, 2014(16)      | Europe | Consecutive   | Included genetic testing, (-)      | 36, (41.7%), [-]                                          | 9                             |
| Frantzen et al, 2012(17)   | Europe | Convenience   | Included genetic testing, (-)      | 29, (0.0%), [-]                                           | 2                             |
| Gergics et al, 2009(18)    | Europe | Convenience   | Included genetic testing, (-)      | 14, (-), [-]                                              | 4                             |
| Graziani et al, 2014(19)   | Europe | Convenience   | Included genetic testing, (-)      | 23, (43.5%), [45.0]                                       | 3                             |
| Losonczy et al, 2013(20)   | Europe | Not specified | Included genetic testing, (-)      | 7, (-), [-]                                               | 0                             |
| Maher et al, 1990(21)      | Europe | Consecutive   | Clinical criteria only, (26.3)     | 152, (52.0%), [-]                                         | 11                            |
| Stanojevic et al, 2007(22) | Europe | Convenience   | Included genetic testing, (-)      | 13, (61.5%), [-]                                          | 6                             |
| Wittstrom et al, 2014(23)  | Europe | Not specified | Included genetic testing, (-)      | 15, (53.3%), [39.3]                                       | 2                             |
| Binderup et al, 2018(24)   | Europe | Consecutive   | Included genetic testing, (-)      | 165, (-), [32.3]                                          | 24                            |

|                               |              |               |                                  |                     |     |
|-------------------------------|--------------|---------------|----------------------------------|---------------------|-----|
| Glushkova et al, 2017(25)     | Europe       | Not specified | Included genetic testing, (-)    | 10, (-), [-]        | 2   |
| Hes et al, 2007(26)           | Europe       | Consecutive   | Included genetic testing, (-)    | 110, (-), [-]       | 17  |
| Ruiz-Llorente et al, 2004(27) | Europe       | Not specified | Included genetic testing, (29.0) | 35, (51.4%), [-]    | 10  |
| Ong et al, 2007(28)           | Europe       | Consecutive   | Included genetic testing, (24.7) | 573, (-), [-]       | 115 |
| Prasad et al, 2016(29)        | Europe       | Consecutive   | Included genetic testing, (-)    | 20, (40.0%), [44.7] | 8   |
| Vanbinst et al, 2019(30)      | Europe       | Not specified | Clinical criteria only, (-)      | 18, (-), [-]        | 3   |
| Wiklund et al, 1997(31)       | Europe       | Convenience   | Included genetic testing, (-)    | 11, (27.3%), [-]    | 0   |
| Chen et al, 2013(32)          | Eastern Asia | Convenience   | Included genetic testing, (-)    | 21, (66.7%), [-]    | 5   |
| Hattori et al, 2006(33)       | Eastern Asia | Not specified | Included genetic testing, (-)    | 25, (-), [-]        | 3   |
| Hwang et al, 2014(34)         | Eastern Asia | Consecutive   | Included genetic testing, (-)    | 25, (44.0%), [-]    | 6   |
| Igarashi et al, 2014(35)      | Eastern Asia | Consecutive   | Not specified, (-)               | 377, (-), [-]       | 64  |
| Kwon et al, 2014(36)          | Eastern Asia | Consecutive   | Included genetic testing, (37.9) | 72, (58.3%), [37.9] | 18  |
| Siu et al, 2011(37)           | Eastern Asia | Not specified | Included genetic testing, (-)    | 14, (-), [-]        | 3   |
| Sriphrapadang et al, 2017(38) | Eastern Asia | Not specified | Included genetic testing, (40.3) | 16, (-), [-]        | 2   |
| Huang et al, 2007(39)         | Eastern Asia | Not specified | Included genetic testing, (-)    | 13, (46.2%), [-]    | 0   |
| Kim et al, 2008(40)           | Eastern Asia | Consecutive   | Included genetic testing, (39.2) | 24, (66.7%), [-]    | 5   |
| Lee et al, 2016(41)           | Eastern Asia | Not specified | Included genetic testing, (-)    | 26, (65.4%), [-]    | 4   |
| Liu et al, 2018(42)           | Eastern Asia | Convenience   | Included genetic testing, (-)    | 21, (42.9%), [-]    | 11  |

---

|                                |               |               |                                  |                     |    |
|--------------------------------|---------------|---------------|----------------------------------|---------------------|----|
| Wang et al, 2018(43)           | Eastern Asia  | Consecutive   | Included genetic testing, (31.2) | 340, (52.6%), [-]   | 46 |
| Wang et al, 2018(44)           | Eastern Asia  | Convenience   | Included genetic testing, (-)    | 7, (85.7%), [-]     | 1  |
| Zhang et al, 2008(45)          | Eastern Asia  | Not specified | Included genetic testing, (-)    | 97, (-), [-]        | 4  |
| Aufforth et al, 2015(46)       | North America | Consecutive   | Included genetic testing, (30.5) | 273, (46.2%), [-]   | 84 |
| Bradley et al, 2009(47)        | North America | Consecutive   | Included genetic testing, (22.4) | 19, (-), [-]        | 2  |
| Chen et al, 1995(48)           | North America | Consecutive   | Included genetic testing, (-)    | 522, (-), [-]       | 92 |
| Salama et al, 2019(49)         | North America | Consecutive   | Included genetic testing, (24.0) | 86, (38.4%), [35.0] | 32 |
| Chacon-Camacho et al, 2010(50) | North America | Convenience   | Included genetic testing, (-)    | 20, (35.0%), [29.5] | 1  |
| Rasmussen et al, 2010(51)      | North America | Not specified | Included genetic testing, (-)    | 36, (36.1%), [21.8] | 3  |
| Fagundes et al, 2019(52)       | South America | Not specified | Included genetic testing, (28.3) | 31, (-), [-]        | 17 |
| Gomy et al, 2010(53)           | South America | Convenience   | Included genetic testing, (-)    | 12, (-), [-]        | 1  |
| Ganesh et al, 2010(54)         | Southern Asia | Convenience   | Clinical criteria only, (-)      | 7, (42.9%), [33.3]  | 6  |
| Vikkath et al, 2015(55)        | Southern Asia | Not specified | Included genetic testing, (35.6) | 31, (54.8%), [-]    | 3  |

---
