# Supplementary material for: Pheochromocytomas and paragangliomas in von Hippel–Lindau disease: not a needle in a haystack
Source: PubMed Central journal article supplement — Endocr Connect. 2021 Sep 30;10(11):R293–304. doi: 10.1530/EC-21-0294 (PMC8630766; doi:10.1530/ec-21-0294), 2021-09-30
Supplement: supplementary_table_4.pdf [file supplementary_table_4.pdf]

## Supplementary Materials

**Table S4.** Number of participants with other von Hippel-Lindau (vHL) phenotypic manifestations.

| Manifestation                           | N vHL patients <sup>a</sup> | N manifestations <sup>b</sup> | References                                                               |
|-----------------------------------------|-----------------------------|-------------------------------|--------------------------------------------------------------------------|
| Central nervous system hemangioblastoma | 1600                        | 1009                          | (12-14, 16, 18, 20, 22, 23, 25-27, 29, 31, 32, 34, 37-40, 44, 45, 48-55) |
| Retinal angioma                         | 2146                        | 1104                          | (6, 12-14, 17, 18, 20-29, 31, 32, 34, 36, 38, 40-42, 45, 47, 49-55)      |
| Renal cell carcinoma                    | 3213                        | 1063                          | (6, 12-32, 34, 36, 38-42, 44, 45, 47, 49-55)                             |
| Pancreatic cyst or cystadenoma          | 1690                        | 649                           | (6, 15, 17, 18, 23-27, 29, 30, 32, 35, 38, 39, 42, 44, 47, 49, 51-55)    |
| Pancreatic neuroendocrine tumor         | 1779                        | 226                           | (6, 14, 15, 17, 19, 21, 23, 24, 29, 35, 38, 42, 49, 51, 52)              |
| Endolymphatic sac tumor                 | 554                         | 19                            | (6, 24, 26, 27, 30, 47, 51, 53, 55)                                      |

<sup>a</sup>total number of vHL participants; <sup>b</sup>total number of vHL participants with the manifestation;
