# Supplementary material for: Pheochromocytomas and paragangliomas in von Hippel–Lindau disease: not a needle in a haystack
Source: PubMed Central journal article supplement — Endocr Connect. 2021 Sep 30;10(11):R293–304. doi: 10.1530/EC-21-0294 (PMC8630766; doi:10.1530/ec-21-0294), 2021-09-30
Supplement: supplementary_table_5.pdf [file supplementary_table_5.pdf]

## Supplementary Materials

**Table S5.** Meta-analytical results on the frequency of pheochromocytoma and/or paraganglioma (PPGL) among patients with von Hippel-Lindau (vHL), when considering only studies with more than 25 participants.

|                                       | <b>N studies</b> | <b>Frequency, % (95% CI)</b> | <b>Q Cochran p value</b> | <b>I<sup>2</sup></b> |
|---------------------------------------|------------------|------------------------------|--------------------------|----------------------|
| Participants with VHL (all VHL types) |                  |                              |                          |                      |
| Frequency of participants with PPGL   | 25               | 18.5 (14.4 – 23.4)           | <0.001                   | 91.5%                |
| Participants with VHL type 2          |                  |                              |                          |                      |
| Frequency of participants with PPGL   | 15               | 60.6 (50.3 – 70.1)           | <0.001                   | 76.3%                |
| Participants with PPGL in VHL type 2A | 4                | 57.2 (47.2 – 66.6)           | 0.073                    | 55.0%                |
| Participants with PPGL in VHL type 2B | 2                | 55.0 (28.4 – 79.0)           | 0.020                    | 81.6%                |
| Participants with PPGL in VHL type 2C | –                | –                            | –                        | –                    |
