# Supplementary material for: Pheochromocytomas and paragangliomas in von Hippel–Lindau disease: not a needle in a haystack
Source: PubMed Central journal article supplement — Endocr Connect. 2021 Sep 30;10(11):R293–304. doi: 10.1530/EC-21-0294 (PMC8630766; doi:10.1530/ec-21-0294), 2021-09-30
Supplement: supplementary_table_6.pdf [file supplementary_table_6.pdf]

## Supplementary Materials

**Table S6.** Meta-analytical results on the frequency of pheochromocytoma among patients with von Hippel-Lindau (vHL), when considering studies with adequate definition of this outcome.

|                                                   | <b>N studies</b> | <b>Frequency - % (95%CI)</b> | <b>Q Cochran p value</b> | <b>I<sup>2</sup></b> |
|---------------------------------------------------|------------------|------------------------------|--------------------------|----------------------|
| Participants with vHL (all vHL types)             |                  |                              |                          |                      |
| Frequency of participants with pheochromocytoma   | 29               | 18.6 (13.5 – 25.0)           | <0.001                   | 79.8%                |
| Participants with VHL type 2                      |                  |                              |                          |                      |
| Frequency of participants with pheochromocytoma   | 39               | 59.4 (52.4 – 66.0)           | 0.007                    | 31.9%                |
| Participants with pheochromocytoma in vHL type 2A | 23               | 56.2 (46.2 – 65.8)           | 0.079                    | 22.5%                |
| Participants with pheochromocytoma in vHL type 2B | 17               | 49.8 (39.9 – 59.8)           | 0.128                    | 17.8%                |
| Participants with pheochromocytoma in vHL type 2C | 9                | 82.2 (71.6 – 92.8)           | 0.875                    | 0%                   |
