# Supplementary material for: Pheochromocytomas and paragangliomas in von Hippel–Lindau disease: not a needle in a haystack
Source: PubMed Central journal article supplement — Endocr Connect. 2021 Sep 30;10(11):R293–304. doi: 10.1530/EC-21-0294 (PMC8630766; doi:10.1530/ec-21-0294), 2021-09-30
Supplement: supplementary_table_7.pdf [file supplementary_table_7.pdf]

## Supplementary Materials

**Table S7.** Meta-analytical results on the frequency of pheochromocytoma among patients with von Hippel-Lindau (vHL), when considering studies with adequate definition of this outcome

|                  | Meta-regression |                    |                    | Subgroup analysis      |                   |                |
|------------------|-----------------|--------------------|--------------------|------------------------|-------------------|----------------|
|                  | N studies       | OR (95% CI)        | P value            | Frequency - % (95% CI) | Q Cochran p value | I <sup>2</sup> |
| Publication year | 52              | 0.98 (0.95 – 1.02) | 0.328              | — <sup>a</sup>         | — <sup>a</sup>    | — <sup>a</sup> |
| Sample size      | 52              | 1.00 (0.99 – 1.01) | 0.842              | — <sup>a</sup>         | — <sup>a</sup>    | — <sup>a</sup> |
| Region           | 52              | —                  | 0.431 <sup>b</sup> | — <sup>a</sup>         | — <sup>a</sup>    | — <sup>a</sup> |
| Europe           | 18              | — <sup>c</sup>     | — <sup>c</sup>     | 61.2 (51.6 – 69.9)     | <0.001            | 61.2%          |
| Asia and Pacific | 21              | 0.77 (0.42 – 1.43) | 0.408              | 54.9 (44.0 – 65.4)     | 0.029             | 40.2%          |
| America          | 13              | 1.25 (0.60 – 2.60) | 0.554              | 67.6 (47.2 – 83.0)     | 0.004             | 71.3%          |
| Sampling Method  | 52              | —                  | 0.820 <sup>b</sup> |                        |                   |                |

<sup>a</sup>Not performed, as this is a continuous variable; <sup>b</sup>Omnibus p-value for this variable; <sup>c</sup>Reference category;

|                                        |    |                    |                    |                    |        |       |
|----------------------------------------|----|--------------------|--------------------|--------------------|--------|-------|
| Consecutive                            | 6  | –c                 | –c                 | 64.4 (47.9 – 78.0) | 0.005  | 73.4% |
| Convenience                            | 39 | 0.79 (0.38 – 1.64) | 0.530              | 58.3 (52.2 – 64.2) | 0.003  | 25.6% |
| Not specified                          | 7  | 0.85 (0.28 – 2.54) | 0.769              | 67.2 (36.9 – 87.8) | 0.003  | 65.3% |
| Diagnosis                              | 52 | –                  | 0.226 <sup>b</sup> |                    |        |       |
| Included genetic testing/not specified | 47 | –c                 | –c                 | 59.0 (52.0 – 65.7) | <0.001 | 58.0% |
| Clinical criteria only                 | 5  | 1.41 (0.56-3.55)   | 0.226              | 73.9 (49.4 – 89.1) | 0.376  | 23.1% |

---
